# Supplementary material for: Genotypic Variation in Cultivated and Wild Sorghum Genotypes in Response to Striga hermonthica Infestation
Source: Frontiers journal article supplement (doi:10.3389/fpls.2021.671984), 2021-07-08
Supplement: Data_Sheet_1.zip [file Data_Sheet_1.zip]

## Sheet: PotTrialMeansALL
GENOTYPE	100 GRAIN WEIGHT(gm)	AGRONOMIC SCORE	DRY PANICLE WEIGHT (gm)	DAYS TO FLOWERING	GRAIN WEIGHT(gm)	OVERALL DISEASE SCORE	OVERALL PEST SCORE	PANICIES HARVESTED	PLANT HEIGHT(cm)	PLANT STAND AFTER THINNING	PLANT VIGOUR	YIELD(t/ha)	NO OF STRIGA PLANTS FORMING CAPSULES	MAXIMUM STRIGA COUNT	ASNPC
AKUOR-ACHOT	4.667	3.667	165.6	72.67	123.1	6.333	5.667	2.333	184.7	3	3	17.59	0.333	9.33	471.3
AKUOR-ACHOTxICSVIII_IN	2.3	4.333	42.5	69	32.23	7.667	5.333	6	169.7	3	2.333	4.6	0.667	8	464.3
B35	3.833	3	79.8	68	53.1	8	6.333	2.667	95.3	3	2.667	7.59	1.333	12.33	597.3
B35_1	3.333	3.833	115.7	67	81.7	8	5.333	2.667	150	2.667	3	11.67	3	13	742
B35xAKUOR-ACHOT	3.333	2.667	174.8	75.88	127.17	5.333	5	2.667	128.7	2.667	3.333	18.17	1.667	11	667.3
B35xE36-1	3.967	3.333	186.8	73.33	140.3	4.333	4	4	163.3	2.667	2	20.04	0.333	12.33	588
B35xF6YQ212	3.667	4	145.2	67	83.57	3.667	3	2.667	95.7	3	2.333	11.94	2	6.67	371
B35xICSVIII_IN	4.9	3.333	153.8	67	105.67	6.333	4.667	5	166.3	2.667	2.667	15.1	0	8.67	296.3
B35xLANDIWHITE	4.433	3.333	87.9	65	70.07	5.333	5.333	7.667	139.3	4	3	10.01	2.667	21.67	914.7
B35xLODOKA	3.8	4	133.6	68.67	90.67	5	5	4.667	177	2.333	3	12.95	3.667	15	1113
E36-1	2.7	2.5	83.9	75.67	46.03	4	5.667	2.667	153.7	2.667	3.333	6.58	3.333	5.33	319.7
E36-1xMACIA	4.2	3	187	80.67	139.3	5.333	3.333	5.333	168.7	3.333	3	19.9	4.333	8.67	735
F6YQ212	4.167	4.333	106.7	65	80.33	8	6	5.667	103.3	2.667	3	11.48	0	2	39.7
F6YQ212xB35	4.133	4.333	78.2	74	59.37	5.333	5.333	4.333	150.7	3	2.667	8.48	1	3.33	175
F6YQ212xLODOKA	4.1	3.833	159.4	66	119.2	5	6	4	203.7	2.333	3.333	17.03	1	4.33	343
FRAMIDA	4.267	3	141.4	67	99.73	5.667	3.667	3	148	2.667	3	14.25	0.667	5	359.3
GADAM	4.133	3.667	90.7	67.67	74.7	7	6.333	3.667	107	3.333	3	10.67	6.333	16.67	1057
GBK016085	3.867	5	151	67.67	107.17	5.667	5	3	219.3	2.333	2.667	15.31	1.333	5.67	154
GBK016109	1.567	4.667	115.4	72.67	21.4	7	4.333	5.333	224.7	2.667	3.333	3.06	0.333	3	149.3
GBK016114	2.5	4.667	125.8	65	73.73	7	4.333	4	222.7	2.667	3	10.12	1.667	15.33	1012.7
GBK040577	3.067	4.667	16.4	71	27.3	6.667	6	5	198	3	2.667	3.9	2.667	12.67	751.3
GBK043565	1.6	4.667	7.3	65.33	4.93	7.667	6.667	4	201.3	3	3.667	0.7	2	9.33	562.3
GBK044054	1.367	4.667	110.7	67.33	32.1	5	4.667	4.667	257	3	3	4.59	3.333	11	599.7
GBK044058	0.667	4.333	7.6	82	4.2	4.333	4.667	5.333	238	2.333	2.333	0.6	8.333	24.67	1647.3
GBK044063	2.933	5	21.3	75.67	4.27	5.333	4	4.333	253.7	2.333	3.333	0.61	3	19.33	1318.3
GBK044065	1.6	4.667	10.5	75.33	5.27	3.667	3.333	5	232	2.333	3	0.75	6	19	1617
GBK044120	3.267	4.667	133	89	50.47	7.333	4.667	4.667	212	3	3	7.21	2.667	8.67	480.7
GBK044336	1.7	5	120.5	68.33	74.47	5.667	4.333	4.333	208	2.333	3.333	10.64	2.667	9	322
GBK044448	3.233	3.833	85.2	44.67	65.07	7	5	3	165	3.333	2.667	9.3	3	8	473.7
GBK045827	3.833	3.167	120.1	71	90	5.667	5.333	5.667	141.3	4	2.667	12.86	2.333	4	226.3
GBK047293	1.967	4	42.5	72.67	14.17	6.667	4.333	5.667	202.3	3	3	2.02	3.667	10	562.3
GBK048152	0.588	4.968	17	72.25	0.66	7.031	6.302	5.273	226.3	2.082	2.855	0.133	0	11.49	77
GBK048156	0.8	5	2.5	70.33	1.1	6	5.667	4.333	226.3	3	3.333	0.16	3.333	11	793.3
GBK048916	2.333	4.667	89.8	72.88	33.23	6.333	6.333	4	191	3	3	4.75	0.667	9	441
GBK048917	1.567	4.667	3.7	68.67	2.8	6.333	6.333	3	159.7	1.667	3.333	0.4	5	19.67	842.3
GBK048921	2.667	5	116.2	75.33	83.97	6.667	5.667	5.667	240	3.333	3	12	2.333	15.33	674.3
GBK048922	3.533	4.667	58.8	75	39.37	4.667	4.667	6	225	2.333	3.333	5.62	6	15.33	1145.7
HAKIKA	4.167	3	103.2	71.67	63.33	7	6.333	5.667	118.7	3	3	9.05	0	9	273
IBUSARxE36-1	3.148	3.774	115.1	72.06	76.12	2.48	4.908	4.864	177	2.667	3	0.14	1	5.67	308
IBUSARxICSVIII_IN	3.467	2.667	214	75	168.37	5.333	4.333	8.667	164	3.333	2.333	24.05	2.333	13.33	620.7
IBUSARxLANDIWHITE	3.148	3.774	115.1	72.06	76.12	2.48	4.908	4.864	177	2.333	2.333	0.14	4.083	10	508.7
ICSVIII_IN	4.267	3.167	110.5	72	88.37	4	5.333	5.333	143.7	2	2.333	12.62	2.667	6	413
ICSVIII_INxB35	2.533	2.667	186.6	79.67	130.63	4.333	4.333	4.333	158.3	3	1.667	18.66	0.667	5	340.7
ICSVIII_INxE36-1	4.033	3.833	115.1	69.67	63.53	6	5.333	5	136.7	3	3	9.08	0	4	165.7
ICSVIII_INxLANDIWHITE	3.433	3.667	246	65.33	126.53	3.667	5	11	203.7	3	2.667	18.08	5.667	11.67	679
ICSVIII_INxLODOKA	3.833	3.167	117.6	66.67	67.4	6	5.333	4.333	183	3	2.667	9.63	3.667	8	672
ICSVIII_INxMACIA	2.233	3	150.2	74	103.27	5	5.667	6.667	140.3	2.667	3	14.75	3.333	9.33	651
IS 9830	2.4	3.333	94.2	75	64.3	6.667	5.667	5.333	130.3	3	3.333	9.19	2	9.67	527.3
KARI MTAMA 1	2.5	4.667	48.8	76	14.07	7.333	4.667	3	128.3	3.333	2.667	2.01	1.333	21	683.7
KAT/ELM/2016 PL1 SD15	4.5	3.667	86.5	69	61.67	6.333	5	8.333	133.7	3.333	2.667	8.81	3.667	9.67	849.3
KAT/ELM/2016 PL82 KM32-2	4.133	2.333	198	80.33	149.17	5.667	4.667	7	138.7	3.333	2	21.31	1.333	9	436.3
LANDIWHITExB35	3.733	3.333	112.5	66.33	72.3	7.031	5.667	6.333	176.3	3.333	2.333	10.33	4.333	14.67	730.3
LANDIWHITExMACIA	3.167	2.667	152.2	71.33	82.63	4.333	3.333	4.333	191.3	2.333	2.333	11.8	3.667	6.33	525
LODOKA	3.2	3	138.5	65.67	87.17	5.333	5	5.667	153	2.667	2.333	12.45	3	6.67	305.7
LODOKAxICSVIII_IN	2.9	2.333	287	72	213.07	4	3	6.333	123.7	3	1.333	30.44	2.667	15	805
LODOKAxLANDIWHITE	2.033	4.333	44.8	88.67	11.07	5	4	5	275.7	3	3	1.58	1.333	3	142.3
LODOKAxOKABIR	4.633	3	183.5	67	149.07	7	4.333	4	187	3	2.333	21.3	3	7.33	399
MACIA	3.033	3	274	77.33	193.1	3.333	3.333	4	114.3	3	2	27.59	1.667	9	282.3
N13	2.733	4.5	58.3	65.67	36.27	7.333	3	2.667	148.3	2.667	3.333	5.18	2.333	8.33	578.7
OKABIR	1.967	4.013	41.1	72.06	10.67	6.48	5.845	2.667	256	3.667	1.667	1.52	3.333	8.33	513.3
OKABIRxAKUOR-ACHOT	3.467	2.333	260	79	203.43	3.333	4.333	12.333	189	3.333	2	29.06	2.333	8.67	585.7
OKABIRxB35	3.8	3.333	195.4	94.33	142.33	5.333	4.333	4.667	277.7	2	1.667	20.33	2	7	359.3
OKABIRxICSVIII_IN	3.433	3.513	110	95.33	73.13	3.48	3.845	5	217.3	3.667	2	10.45	2.667	11.67	651
SRN39	4.967	3.333	119.6	67	86.17	5	5	2.667	138	2.333	2.667	12.31	2	3.67	137.7
Grand mean	3.148	3.774	115.1	72.06	76.1	5.646	4.908	4.86	177	2.855	2.732	10.53	2.48	10.09	566.33
CV(%)	27.9	17.6	54.8	9.3	58.3	18.9	20.8	39	13.5	23.4	22.9	60.4	80	33	52.6
LSD	1.4209	1.0752	101.93	10.873	71.69	1.7251	1.6511	3.065	38.62	1.0798	1.0101	10.285	3.206	5.387	481.6
P value	<.001	<.001	<.001	<.001	<.001	<.001	<.001	<.001	<.001	0.04	<.001	<.001	<.001	<.001	<0.01

## Sheet: PottrialParentsOnly
GENOTYPE	100 GRAIN WEIGHT( GM)	AGRONOMIC SCORE	RY PANICLE WEIGHT (gm)	DAYS TO FLOWERING	GRAIN WEIGHT (gm)	OVERALL DISEASE SCORE	OVERALL PEST SCORE	PANICLES HARVESTED	PLANT HEIGHT	PLANT STAND AFTER THINNING	PLANT VIGOR	Yield (t/ha)	NO OF STRIGA PLANTS FORMING CAPSULES	MAXIMUM STRIGA COUNT	ASNPC
AKUOR-ACHOT	4.667	3.667	165.63	72.67	123.1	6.333	5.667	2.333	184.7	3	3	17.586	0.333	9.33	471.3
B35	3.833	3	79.77	68	53.1	8	6.333	2.667	95.3	3	2.667	7.586	1.333	12.33	597.3
B35_1	3.333	3.833	115.73	67	81.7	8	5.333	2.667	150	2.667	3	11.671	3	13	742
E36-1	2.7	2.5	83.93	75.67	46.03	4	5.667	2.667	153.7	2.667	3.333	6.576	3.333	5.33	319.7
F6YQ212	4.167	4.333	106.73	65	80.33	8	6	5.667	103.3	2.667	3	11.476	0	2	39.7
FRAMIDA	4.267	3	141.37	67	99.73	5.667	3.667	3	148	2.667	3	14.248	0.667	5	359.3
GADAM	4.133	3.667	90.73	67.67	74.7	7	6.333	3.667	107	3.333	3	10.671	6.333	16.67	1057
GBK 016109	1.567	4.667	115.43	72.67	21.4	7	4.333	5.333	224.7	2.667	3.333	3.057	0.333	3	149.3
GBK 044054	1.367	4.667	110.67	67.33	32.1	5	4.667	4.667	257	3	3	4.586	3.333	11	599.7
GBK 048152	0.529	4.812	20.35	73.06	0.66	6.872	6.082	5.228	224	2.142	2.753	0.133	0.112	11.76	77
GBK016085	3.867	5	151.03	67.67	107.17	5.667	5	3	219.3	2.333	2.667	15.31	1.333	5.67	154
GBK016114	2.5	4.667	125.83	65	73.73	7	4.333	4	222.7	2.667	3	9.804	1.667	15.33	1012.7
GBK040577	3.067	4.667	16.43	71	27.3	6.667	6	5	198	3	2.667	3.9	2.667	12.67	751.3
GBK043565	1.6	4.667	7.27	65.33	4.93	7.667	6.667	4	201.3	3	3.667	0.705	2	9.33	562.3
GBK044058	0.667	4.333	7.6	82	4.2	4.333	4.667	5.333	238	2.333	2.333	0.6	8.333	24.67	1647.3
GBK044063	2.933	5	21.33	75.67	4.27	5.333	4	4.333	253.7	2.333	3.333	0.61	3	19.33	1318.3
GBK044065	1.6	4.667	10.54	75.33	5.27	3.667	3.333	5	232	2.333	3	0.752	6	19	1617
GBK044120	3.267	4.667	132.97	89	50.47	7.333	4.667	4.667	212	3	3	7.21	2.667	8.67	480.7
GBK044336	1.7	5	120.47	69.13	74.47	5.667	4.333	4.333	208	2.333	3.333	10.638	2.667	9	322
GBK044448	3.233	3.833	85.17	44.67	65.07	7	5	3	165	3.333	2.667	9.295	3	8	473.7
GBK045827	3.833	3.167	120.1	71	90	5.667	5.333	5.667	141.3	4	2.667	12.857	2.333	4	226.3
GBK047293	1.967	4	42.5	72.67	14.17	6.667	4.333	5.667	202.3	3	3	2.024	3.667	10	562.3
GBK048156	0.8	5	2.47	70.33	1.1	6	5.667	4.333	226.3	3	3.333	0.157	3.333	11	793.3
GBK048916	2.333	4.667	89.77	72.45	33.23	6.333	6.333	4	191	3	3	4.748	0.667	9	441
GBK048917	1.567	4.667	3.7	68.67	2.8	6.333	6.333	3	159.7	1.667	3.333	0.4	5	19.67	842.3
GBK048921	2.667	5	116.2	75.33	83.97	6.667	5.667	5.667	240	3.333	3	11.995	2.333	15.33	674.3
GBK048922	3.533	4.667	58.77	75	39.37	4.667	4.667	6	225	2.333	3.333	5.624	6	15.33	1145.7
HAKIKA	4.167	3	103.2	71.67	63.33	7	6.333	5.667	118.7	3	3	9.048	0	9	273
ICSV III IN	4.267	3.167	110.5	72	88.37	4	5.333	5.333	143.7	2	2.333	12.624	2.667	6	413
IS 9830	2.4	3.333	94.17	75	64.3	6.667	5.667	5.333	130.3	3	3.333	9.186	2	9.67	527.3
KARI MTAMA 1	2.5	4.667	48.8	76	14.07	7.333	4.667	3	128.3	3.333	2.667	2.01	1.333	21	683.7
KAT/ELM/2016 PL1 SD15	4.5	3.667	86.47	69	61.67	6.333	5	8.333	133.7	3.333	2.667	8.81	3.667	9.67	849.3
KAT/ELM/2016 PL82 KM32-2	4.133	2.333	197.97	80.33	149.17	5.667	4.667	7	138.7	3.333	2	21.31	1.333	9	436.3
LODOKA	3.2	3	138.5	65.67	87.17	5.333	5	5.667	153	2.667	2.333	12.452	3	6.67	305.7
MACIA	3.033	3	274.03	77.33	193.1	3.333	3.333	4	114.3	3	2	27.586	1.667	9	282.3
N13	2.733	4.5	58.27	65.67	36.27	7.333	3	2.667	148.3	2.667	3.333	5.181	2.333	8.33	578.7
OKABIR	1.967	4.09	41.13	70.97	10.67	6.56	5.954	2.667	256	3.667	1.667	1.524	3.333	8.33	513.3
SRN39	4.967	3.33	119.63	67	86.17	5	5	2.667	138	2.333	2.667	12.31	2	3.67	137.7
GRAND MEAN	2.883	4.05	89.9	70.97	56.5	6.134	5.115	4.4	178.6	2.82	2.879	8.06	2.6	10.68	590
CV	31.3	15	60.8	10.9	61.7	15.5	17.6	33.3	13	24.1	20	62.2	75.7	34.5	53.6
LSD	1.4667	0.9911	88.88	12.552	56.8	1.5525	1.4656	2.386	37.89	1.1057	0.9355	8.166	3.204	6.003	514.8
FPr	<0.01	<0.01	<0.01	<0.01	<0.01	<0.01	<0.01	<0.01	<0.01	0.08	0.027	<0.01	<0.01	<0.01	<0.01

## Sheet: PottrialProgeniesOnly
GENOTYPE	100 GRAIN WEIGHT(gm)	AGRONOMIC SCORE	DRY PANICE WEIGHT (gm)	DAYS TO FLOWERING	GRAIN WEIGHT (gm)	NUMBER OF STRIGA PLANTS FORMING CAPSULES	OVERALL DISEASE SCORE	OVERALL PEST SCORE	PANICLES HARVESTED	PLANT HEIGHT (cm)	PLANT STAND AFTER THINNING	PLANT VIGOR	YIELD(t/ha)	MAXIMUM STRIGA COUNT	ASNPC
AKUOR-ACHOTxICSVIII_IN	2.3	4.333	42.5	69	32.2	0.67	7.67	5.33	6	169.7	3	2.333	4.6	8	464.3
B35xAKUOR-ACHOT	3.333	2.667	174.8	76.52	127.2	1.67	5.33	5	2.67	128.7	2.667	3.333	18.17	11	667.3
B35xE36-1	3.967	3.333	186.8	73.33	140.3	0.33	4.33	4	4	163.3	2.667	2	20.04	12.33	588
B35xF6YQ212	3.667	4	145.2	67	83.6	2	3.67	3	2.67	95.7	3	2.333	11.94	6.67	371
B35xICSVIII_IN	4.9	3.333	153.8	67	105.7	0	6.33	4.67	5	166.3	2.667	2.667	15.1	8.67	296.3
B35xLANDIWHITE	4.433	3.333	87.9	65	70.1	2.67	5.33	5.33	7.67	139.3	4	3	10.01	21.67	914.7
B35xLODOKA	3.8	4	133.6	68.67	90.7	3.67	5	5	4.67	177	2.333	3	12.95	15	1113
E36-1xMACIA	4.2	3	187	80.67	139.3	4.33	5.33	3.33	5.33	168.7	3.333	3	19.9	8.67	735
F6YQ212xB35	4.133	4.333	78.2	74	59.4	1	5.33	5.33	4.33	150.7	3	2.667	8.48	3.33	175
F6YQ212xLODOKA	4.1	3.833	159.4	66	119.2	1	5	6	4	203.7	2.333	3.333	17.03	4.33	343
IBUSARxE36-1	3.564	3.329	155.2	73.81	107.3	1	2.35	4.57	5.6	174.5	2.667	3	0.8	5.67	308
IBUSARxICSVIII_IN	3.467	2.667	214	75	168.4	2.33	5.33	4.33	8.67	164	3.333	2.333	24.05	13.33	620.7
IBUSARxLANDIWHITE	3.564	3.329	155.2	73.81	107.3	4.28	2.35	4.57	5.6	174.5	2.333	2.333	0.8	10	508.7
ICSVIII_INxB35	2.533	2.667	186.6	79.67	130.6	0.67	4.33	4.33	4.33	158.3	3	1.667	18.66	5	340.7
ICSVIII_INxE36-1	4.033	3.833	115.1	69.67	63.5	0	6	5.33	5	136.7	3	3	9.08	4	165.7
ICSVIII_INxLANDIWHITE	3.433	3.667	246	65.33	126.5	5.67	3.67	5	11	203.7	3	2.667	18.08	11.67	679
ICSVIII_INxLODOKA	3.833	3.167	117.6	66.67	67.4	3.67	6	5.33	4.33	183	3	2.667	9.63	8	672
ICSVIII_INxMACIA	2.233	3	150.2	74	103.3	3.33	5	5.67	6.67	140.3	2.667	3	14.75	9.33	651
LANDIWHITExB35	3.733	3.333	112.5	66.33	72.3	4.33	7.29	5.67	6.33	176.3	3.333	2.333	10.33	14.67	730.3
LANDIWHITExMACIA	3.167	2.667	152.2	71.33	82.6	3.67	4.33	3.33	4.33	191.3	2.333	2.333	11.8	6.33	525
LODOKAxICSVIII_IN	2.9	2.333	287	72	213.1	2.67	4	3	6.33	123.7	3	1.333	30.44	15	805
LODOKAxLANDIWHITE	2.033	4.333	44.8	88.67	11.1	1.33	5	4	5	275.7	3	3	1.58	3	142.3
LODOKAxOKABIR	4.633	3	183.5	67	149.1	3	7	4.33	4	187	3	2.333	21.3	7.33	399
OKABIRxAKUOR-ACHOT	3.467	2.333	260	79	203.4	2.33	3.33	4.33	12.33	189	3.333	2	29.06	8.67	585.7
OKABIRxB35	3.8	3.333	195.4	94.33	142.3	2	5.33	4.33	4.67	277.7	2	1.667	20.33	7	359.3
OKABIRxICSVIII_IN	3.433	3.392	110	95.33	73.1	2.67	3.35	3.67	5	217.3	3.667	2	10.45	11.67	651
GRAND MEAN	3.564	3.329	155.2	73.81	107.3	2.32	4.92	4.57	5.6	174.5	2.91	2.513	14.21	9.24	531
CV	24.1	21.2	48.5	6.6	52.5	86	24.6	24.9	43.8	14.3	22.4	26.8	56.6	30.1	51.7
LSD	1.4097	1.1589	123.7	8.068	92.5	3.272	1.988	1.872	4.026	41.04	1.0706	1.1036	13.214	4.564	450.6
FPr	0.009	0.009	0.02	<0.01	0.007	0.05	<0.01	0.049	0.002	<0.01	0.148	0.033	<0.01	<0.01	<0.01

## Sheet: CorrelationsPottrial
CORRELATION COEFFICIENTS FOR TRAITS IN POTTED TRIAL
	HGW (gm)	ASNPC	DPWT (gm)	DTF	NSFC	ODS	OPS	PH (cm)	YLD (t/ha)	NSmax
ASNPC	-0.2288NS	-
DPWT (gm)	0.4862***	-0.2717*	-
DTF	-0.1239NS	0.0553NS	0.1146NS	-
NSFC	-0.2255NS	0.7347***	-0.2028NS	0.018NS	-
ODS	-0.0424NS	-0.1019NS	-0.3849**	-0.3151**	-0.2412*	-
OPS	-0.0408NS	-0.1307NS	-0.3963**	-0.2676*	-0.0913NS	0.4616***	-
PH (cm)	-0.4792***	0.2053NS	-0.2662*	0.3302**	0.2126NS	-0.0839NS	-0.0909NS	-
YLD (t/ha)	0.5427***	-0.1849NS	0.9239***	0.0883NS	-0.1801NS	-0.2533*	-0.3294**	-0.3296**	-
NSmax	-0.2805*	0.8451***	-0.2728*	0.0408NS	0.5505***	0.0314NS	0.0134NS	0.1173NS	-0.1896NS
HGW - Hundred grain weight; ASNPC-Area Under Striga Number Progress Curve; DPWT - Dry panicle weight; DTF-Days To Flowering; NSFC - Number of Striga forming capsules; ODS - Overall disease score; OPS - Overall pest score; PH - Plant height; YLD - yield
* Significant at P<0.05
**Significant at P<0.01
***Significant at P<0.001

## Sheet: HeritabilityPottrial
		HERITABILITY ESTIMATES FOR TRAITS IN POT TRIAL(PROGENIES)
	RANGE	MEAN	MSG	MSE	σ2 G	σ2 P	PCV	GCV	H2 bs
100 GW	2.033 - 4.9	3.55	1.6109	0.7725	0.279467	0.536967	20.6417	14.8914	0.520454
DPW	42.5 -287	154.7	11527	5651	1958.67	3842.33	40.0689	28.6082	0.50976
DTF	65 - 95.33	73.91	224.72	26.41	66.1033	74.9067	11.71	11.0004	0.882476
YIELD	1.59 - 30.44	14.04	187.82	65.48	40.78	62.6067	56.3564	45.4838	0.651368
ODS	2.5 -7.667	4.9	4.982	1.496	1.162	1.66067	26.2994	21.9992	0.699719
OPS	3 TO 6	4.59	2.231	1.605	0.208667	0.743667	18.7878	9.95208	0.280592
PANICLES HARVESTED	2.67 - 12.33	5.62	16.206	7.362	2.948	5.402	41.3562	30.5511	0.545724
PLANT HEIGHT	95.7 - 277.7	173.9	5335.4	605.7	1576.57	1778.47	24.2506	22.8327	0.886475
NS Max	2 TO 22	9.29	56.79	11.61	15.06	18.93	46.8338	41.7731	0.795563
NSFC	0 -6	2.31	6.827	4.157	0.89	2.27567	65.3044	40.8397	0.391094
TOTAL ASNPC	142.3 -1113	531	169309	75477	31277.3	56436.3	44.7389	33.3058	0.554206
The H2 bs scores were classification : 0–30% = low; 30–60% = moderate; and >60% = high.
100 GW-100 GRAIN WEIGHT(gm), DPW-Dry Panicle Weight, DTF-Days To Flowering, DTM-Ddays to Maturity, ODS-Overall Disease Score,OPS-Overall Pest Score,Nmax-Maximum Striga Count, NSFC-Number of Striga plants Forming Capsules, ASNPC-Area Under Striga Number Progress Curve
		HERITABILITY ESTIMATES FOR TRAITS IN POT TRIAL(PARENTS)
	RANGE	MEAN	MSG	MSE	σ2 G	σ2 P	PCV	GCV	H2 bs
100 GW	0.414 - 4.967	2.883	4.2172	0.8164	1.1336	1.40573	41.1251	36.9305	0.806412
DPW	2.5 - 274	89.9	10351	2982	2456.33	3450.33	65.3388	55.1295	0.711912
DTF	44.67 - 89	70.97	140.58	59.32	27.0867	46.86	9.64554	7.33336	0.578034
YIELD	0.133- 27.59	8.06	120.14	25.16	31.66	40.0467	78.5142	69.8104	0.790578
ODS	3.333 - 8	6.134	4.5632	0.9094	1.21793	1.52107	20.1062	17.9915	0.80071
OPS	3 - 6.667	5.115	2.6415	0.8104	0.610367	0.8805	18.3451	15.2739	0.693205
PANICLES HARVESTED	2.33 -8.33	4.4	5.898	2.149	1.24967	1.966	31.8668	25.4065	0.635639
PLANT HEIGHT	95.3 - 257	178.6	7008.2	541.9	2155.43	2336.07	27.0621	25.9948	0.922676
NS Max	2 TO 25	10.68	83.99	13.6	23.4633	27.9967	49.543	45.3548	0.838076
NSFC	0 -8	2.6	10.353	3.875	2.15933	3.451	71.4495	56.518	0.625712
TOTAL ASNPC	39.7-1647.3	590	448828	100110	116239	149609	65.5582	57.7863	0.776952
The H2 bs scores were classification : 0–30% = low; 30–60% = moderate; and >60% = high.
100 GW-100 GRAIN WEIGHT(gm), DPW-Dry Panicle Weight, DTF-Days To Flowering, DTM-Ddays to Maturity, ODS-Overall Disease Score,OPS-Overall Pest Score,Nmax-Maximum Striga Count, NSFC-Number of Striga plants Forming Capsules, ASNPC-Area Under Striga Number Progress Curve

## Sheet: SickplotMeansALL
GENOTYPE	100 GRAIN WEIGHT(gm)	AGRONOMIC SCORE	DRY PANICLE WEIGHT(gm)	DAYS TO FLOWERING	GRAIN WEIGHT (gm)	OVERALL DISEASE SCORE	OVERALL PEST SCORE	PANICLES HARVESTED	PLANT HEIGHT(cm)	PLANT STAND AFTER THINNING	PLANT VIGOR	YIELD (t/ha)	NUMBER OF STRIGA FORMING CAPSULES	MAXIMUM STRIGA COUNT	ASNPC
AKUOR-ACHOT	3.5	4	262.7	83	138	6.667	6.667	16.67	188.7	22.67	3.333	0.92	36	85	3607
AKUOR-ACHOTxICSVIII_IN	3.267	4.333	81	97	64.7	5.667	5	8.67	142.3	15	3.333	0.431	34	104.67	3446
B35	2	4.667	49	83.33	30	8	6	6.33	87.7	22	3.333	0.2	42	128.67	5269
B35_1	2.233	4	151.7	77.67	117.3	7	5.667	9.67	96	21.67	3.333	0.782	29.67	53	1806
B35xAKUOR-ACHOT	2.567	3	847.3	81	407.3	6.667	6.667	21.33	145	25.33	3.333	2.716	20.67	36.33	1575
B35xE36-1	3.3	4.333	192.7	81	71.7	6.667	5	7.33	159.7	23	2.333	0.478	33	69.67	3064
B35xF6YQ212	2.433	3.667	331	79.67	142.3	6.667	6.333	13	133.7	22.33	3	0.949	10.33	34.67	1195
B35xICSVIII_IN	1.867	5	247.3	85	112	7	5.667	15	150.7	22.33	3	0.747	8	20.33	922
B35xLANDWHITE	2.5	4.333	290	89	188.3	5.333	5	7.33	175	20.67	3	1.256	18	33.33	1318
B35xLODOKA	2.6	3.667	556	88	304.7	5	6	18.67	203.7	28	3	2.031	11.67	19	824
E36-1	3.3	2.667	652.3	79.67	438	4.667	5.333	19.33	167	20.67	3.333	2.92	28.33	76	2910
E36-1xMACIA	3.533	3	726.3	89.33	373.7	5.667	4	18.33	184	24.67	3.333	2.491	22.33	89.67	3843
F6YQ212	1.867	3.667	170	82.67	66	8	6.333	18.33	114.7	28.67	3.333	0.44	3.67	13	434
F6YQ212xB35	3.6	4.167	734.3	89	427.3	5.333	6	21.33	193.7	22.33	3.667	2.849	6.33	24.67	714
F6YQ212xLODOKA	3.1	5	238.7	90.67	128	7.333	6.667	13.33	235.3	24.33	2.667	0.853	22.33	54.33	2522
FRAMIDA	3.133	4.323	788.7	73.67	531	6.101	6.01	12.33	189.4	20	3.333	3.54	11.67	26	1267
GADAM	2.3	4.167	336.7	89	193	7.333	6	11.12	116.2	19.33	3.333	1.287	16.67	27.33	1190
GBK016085	2.967	5.333	547.7	74.81	488.3	6	7.333	19.84	168	25.33	5	3.277	16	33.33	1300
GBK016109	0.333	5	164.3	86.67	54.7	7.333	6	28.33	195	26	5	0.364	69.3	150.67	4881
GBK016114	2.267	4.667	289	70	66	6	4	39.33	200.3	25.33	4.667	0.44	45	107.67	4797
GBK040577	2.567	5.333	308	82	173	4.667	6.667	22	206.3	25	4.667	1.156	6.67	24.33	1225
GBK043565	1.6	5.667	308	87.33	173.3	5.667	6.333	19.84	180.7	16.33	4.667	1.156	18.33	67.67	2490
GBK044054	0.933	5	243.7	75	86.3	6.667	5.333	54	216.7	27.67	4	0.576	8.33	87.67	4041
GBK044058	1.033	4.333	33.3	94.31	21	5	6	17	227.7	10.67	3	0.14	54.67	168.33	5698
GBK044063	0.467	5	393	92	109	5.333	5	21.67	224.7	13.67	4.667	0.727	51.33	117.67	4492
GBK044065	1.7	4.378	301	82.88	151	5.434	6.04	23.28	235	20	3.909	1.014	21	60	0
GBK044120	1.6	5	90	85.67	26	7	5	30	266.7	20	4.667	0.173	15	64.67	1195
GBK044336	1.133	5	269.7	79.67	72.7	3.667	3.333	55.67	226.3	26.67	4.667	0.484	10.33	29.33	926
GBK044448	1.8	4.667	14	85.33	7	6	6.667	7.33	182	20.33	5	0.064	14	34.67	1113
GBK045827	2.6	3.333	858.3	74.33	429.3	5.333	5	20.33	182.7	26	3.333	2.862	6.33	14.33	523
GBK047293	2.433	4.022	243.7	84.16	192.7	5.845	5.364	58.33	184.1	14.67	5	1.284	11.67	34	994
GBK048152	1.84	4.434	156	83.65	60.8	5.723	6.37	3.33	234.1	3.61	4.919	0.402	10	156.67	3334
GBK048156	1	4.333	7	80	5.1	5.589	6.013	3.33	227.1	3.61	5	0.03	21	59.8	0
GBK048916	2.167	3.5	124.3	94.67	108.3	5.667	4.667	4	186	11.33	3	0.722	19.33	47.33	1976
GBK048917	1.767	4.5	308	81.65	173.3	5.734	6.138	19.84	166.9	20.67	4.959	1.156	2.33	60	0
GBK048921	2.567	4.667	377.3	83.67	264.3	5	6.333	20	179.7	13.67	5	1.77	7.33	21.67	838
GBK048922	2.033	5	113.7	96	45.3	5	4.333	24.33	194.7	20	5	0.302	46.67	100.33	2210
HAKIKA	3.433	3.667	598.7	81.67	401.3	6.667	5.333	15.33	119.7	25.67	4	2.676	13.33	28	1008
IBUSARxE36-1	2.301	5	391.9	81	230.4	7	6.667	17.46	247	24	4	1.537	32	78.67	2844
IBUSARxICSVIII_IN	2.301	2.333	391.9	133.67	230.4	5	5	17.46	260.3	20.33	3	1.537	26	66.33	6118
IBUSARxLANDWHITE	1.667	2.333	952.3	78.33	676.7	3.667	3.667	18.33	172.7	29.67	2.333	4.511	37.67	148	3414
ICSVIII_IN	3.067	3.5	538.3	73	315	7	6.333	16.67	189	21.67	4	2.1	3	12.33	406
ICSVIII_INxB35	3.3	3	1170.7	82.33	529.7	3.667	3	18.33	168.3	24	2.667	3.531	15	35.67	1328
ICSVIII_INxE36-1	3.767	3.5	328.7	77	377	5	5.667	17.67	166.7	23.33	3.333	2.513	26.33	60	2875
ICSVIII_INxLANDWHITE	1.167	3	1089	70.67	744.7	6.333	5	16	260.7	22.33	3	4.964	16.33	54	3101
ICSVIII_INxLODOKA	3.967	4	140	86	118.7	7.333	6	6.72	198	11.67	4	0.791	22	38.33	1244
ICSVIII_INxMACIA	2.067	4.333	572	80.67	404	5	3.333	12.67	232.3	20.67	2.333	2.693	24.67	74.67	2212
IS9830	2.167	3.833	299.7	85.67	168	6.667	6.333	12.67	118.3	19.33	3.667	1.12	10	22.33	882
KARI MTAMA 1	2.567	3	358	87.67	226	6.667	4.333	13.33	151.7	21.33	2.667	1.507	34	94.33	3232
KAT/ELM/2016PL1SD15	1.633	2	563	82.33	414.7	6.333	3.333	12	178.7	26.67	3	2.764	16.33	36.67	1181
KAT/ELM/2016PL82KM32-2	2.033	3.5	259	85	123.3	6	5.667	17	148.3	21.67	3	0.822	28.33	99	3936
LANDWHITExB35	3.633	4.667	200	79.67	116	5.333	6.667	7.67	173	19.67	3	0.773	46	93.33	4251
LANDWHITExMACIA	3.067	2.667	190	70.67	143.3	7	6.333	7.33	177.7	17	2.333	0.956	20.67	89	3502
LODOKA	1.4	2.667	155.3	78	79.7	6.333	5.333	10.67	107.7	20	2.667	0.531	19.33	54	2665
LODOKAxICSVIII_IN	1.6	2	920.3	78	532	5.333	2.333	15.67	148.3	26	2.333	3.547	20	54.33	2364
LODOKAxLANDWHITE	1.5	5.333	324.7	95.33	166	5.333	5	7.67	324	22.67	3.333	1.107	13.67	36.67	1652
LODOKAxOKABIR	2.333	2	334	77.67	225.7	4.667	2.333	7.67	184	17	2.667	1.504	49.67	157	6225
MACIA	2.6	3.889	707.7	64.67	432.7	6.333	5.667	18	135	24.67	2	2.884	17	26	784
N13	2.833	4	217	97.33	102.7	4.333	4.333	9	137.3	20.33	4.333	0.684	9	20	1034
OKABIR	1.767	5	167.7	105.33	126.7	4	4.333	14	217.7	25.33	3	0.844	22.33	74.33	2527
OKABIRxAKUOR-ACHOT	1.067	2.667	953	68	532	4.667	4.333	17.67	183.7	26.67	2.667	3.547	26	65.67	2536
OKABIRxB35	2.301	5	391.9	90.33	230.4	6	6.333	17.46	195.3	17.33	4	1.537	21.67	49.67	2427
OKABIRxICSVIII_IN	3.367	4.667	707.7	94.67	450	3.667	5	23	275.3	22.33	3.333	3	27.33	62	2046
SRN39	2.433	4.667	352.7	89.33	205.3	7	5.333	20	144.3	22.33	3	1.369	1.33	7	299
MEAN	2.301	4.022	392	84.16	230.4	5.845	5.364	17.46	184.1	21.05	3.559	1.537	22	62.1	2250
CV	31.9	12.2	45.8	8	49.4	12.6	13.5	24.1	9.9	21.2	15	49.4	50.7	53.8	60.6
LSD	1.1876	0.7905	289.9	10.938	183.96	1.1871	1.1671	6.815	29.4	7.216	0.8606	1.2261	81.034	53.97	2204.3
Fpr	<0.01	<0.01	<0.01	<0.01	<0.01	<0.01	<0.01	<0.01	<0.01	<0.01	<0.01	<0.01	<0.01	<0.01	<0.01

## Sheet: SickplotParentsOnly
GENOTYPE	100 GRAIN WEIGHT(gm)	AGRONOMIC SCORE	DRY PANICLE WEIGHT(gm)	DAYS TO FLOWERING	GRAIN WEIGHT (gm)	OVERALL DISEASE SCORE	OVERALL PEST SCORE	PANICLES HARVESTED	PLANT HEIGHT(cm)	PLANT STAND AFTER THINNING	PLANT VIGOR	YIELD (t/ha)	NUMBER OF STRIGA FORMING CAPSULES	MAXIMUM STRIGA COUNT	ASNPC
AKUOR-ACHOT	3.5	4	262.7	83	138	6.667	6.667	16.67	188.7	22.67	3.333	0.92	36	85	3607
B35	2	4.667	49	83.33	30	8	6	6.33	87.7	22	3.333	0.2	42	128.67	5269
B35_1	2.233	4	151.7	77.67	117.3	7	5.667	9.67	96	21.67	3.333	0.782	29.67	53	1806
E36-1	3.3	2.667	652.3	79.67	438	4.667	5.333	19.33	167	20.67	3.333	2.92	28.33	76	2910
F6YQ212	1.867	3.667	170	82.67	66	8	6.333	18.33	114.7	28.67	3.333	0.44	3.67	13	434
FRAMIDA	3.133	4.323	788.7	73.67	531	6.101	6.01	12.33	189.4	20	3.333	3.54	11.67	26	1267
GADAM	2.3	4.167	336.7	89	193	7.333	6	11.12	116.2	19.33	3.333	1.287	16.67	27.33	1190
GBK016085	2.967	5.333	547.7	74.81	488.3	6	7.333	19.84	168	25.33	5	3.277	16	33.33	1300
GBK016114	2.267	4.667	289	70	66	6	4	39.33	200.3	25.33	4.667	0.44	45	107.67	4797
GBK040577	2.567	5.333	308	82	173	4.667	6.667	22	206.3	25	4.667	1.156	6.67	24.33	1225
GBK043565	1.6	5.667	308	87.33	173.3	5.667	6.333	19.84	180.7	16.33	4.667	1.156	18.33	67.67	2490
GBK044058	1.033	4.333	33.3	94.31	21	5	6	17	227.7	10.67	3	0.14	54.67	168.33	5698
GBK044063	0.467	5	393	92	109	5.333	5	21.67	224.7	13.67	4.667	0.727	51.33	117.67	4492
GBK044065	1.7	4.378	301	82.88	151	5.434	6.04	23.28	235	20	3.909	1.014	21	60	0
GBK044120	1.6	5	90	85.67	26	7	5	30	266.7	20	4.667	0.173	15	64.67	1195
GBK044336	1.133	5	269.7	79.67	72.7	3.667	3.333	55.67	226.3	26.67	4.667	0.484	10.33	29.33	926
GBK044448	1.8	4.667	14	85.33	7	6	6.667	7.33	182	20.33	5	0.064	14	34.67	1113
GBK045827	2.6	3.333	858.3	74.33	429.3	5.333	5	20.33	182.7	26	3.333	2.862	6.33	14.33	523
GBK047293	2.433	4.022	243.7	84.16	192.7	5.845	5.364	58.33	184.1	14.67	5	1.284	11.67	34	994
GBK048156	1	4.333	7	80	5.1	5.589	6.013	3.33	227.1	3.61	5	0.03	21	59.8	0
GBK048916	2.167	3.5	124.3	94.67	108.3	5.667	4.667	4	186	11.33	3	0.722	19.33	47.33	1976
GBK048921	2.567	4.667	377.3	83.67	264.3	5	6.333	20	179.7	13.67	5	1.77	7.33	21.67	838
GBK048922	2.033	5	113.7	96	45.3	5	4.333	24.33	194.7	20	5	0.302	46.67	100.33	2210
HAKIKA	3.433	3.667	598.7	81.67	401.3	6.667	5.333	15.33	119.7	25.67	4	2.676	13.33	28	1008
ICSV III IN	3.067	3.5	538.3	73	315	7	6.333	16.67	189	21.67	4	2.1	3	12.33	406
IS 9830	2.167	3.833	299.7	85.67	168	6.667	6.333	12.67	118.3	19.33	3.667	1.12	10	22.33	882
KARI MTAMA 1	2.567	3	358	87.67	226	6.667	4.333	13.33	151.7	21.33	2.667	1.507	34	94.33	3232
KAT/ELM/2016 PL1 SD15	1.633	2	563	82.33	414.7	6.333	3.333	12	178.7	26.67	3	2.764	16.33	36.67	1181
KAT/ELM/2016 PL82 KM32-2	2.033	3.5	259	85	123.3	6	5.667	17	148.3	21.67	3	0.822	28.33	99	3936
LODOKA	1.4	2.667	155.3	78	79.7	6.333	5.333	10.67	107.7	20	2.667	0.531	19.33	54	2665
MACIA	2.6	3.889	707.7	64.67	432.7	6.333	5.667	18	135	24.67	2	2.884	17	26	784
N13	2.833	4	217	97.33	102.7	4.333	4.333	9	137.3	20.33	4.333	0.684	9	20	1034
OKABIR	1.767	5	167.7	105.33	126.7	4	4.333	14	217.7	25.33	3	0.844	22.33	74.33	2527
SRN39	2.433	4.667	352.7	89.33	205.3	7	5.333	20	144.3	22.33	3	1.369	1.33	7	299
GBK016109	0.333	5	164.3	86.67	54.7	7.333	6	28.33	195	26	5	0.364	69.3	150.67	4881
GBK044054	0.933	5	243.7	75	86.3	6.667	5.333	54	216.7	27.67	4	0.576	8.33	87.67	4041
GBK048152	1.84	4.434	156	83.65	60.8	5.723	6.37	3.33	234.1	3.61	4.919	0.402	10	156.67	3334
GBK048917	1.767	4.5	308	81.65	173.3	5.734	6.138	19.84	166.9	20.67	4.959	1.156	2.33	60	0
GRAND MEAN	2.081	4.226	310	83.47	179.4	5.998	5.538	19.59	175.9	20.8	3.915	1.197	21	61.1	2012
CV	26.3	12.2	36.5	7.2	45	13.3	14.1	22.2	9	22.4	13.3	45	53.6	55.5	69.7
LSD	0.8897	0.8391	184.2	9.849	131.43	1.303	1.275	7.088	25.85	7.418	0.8458	0.8759	18.29	55.25	2281.3
FPr	<0.01	<0.01	<0.01	<0.01	<0.01	<0.01	<0.01	<0.01	<0.01	<0.01	<0.01	<0.01	<0.01	<0.01	<0.01

## Sheet: ickplotProgeniesOnly
GENOTYPE	100 GRAIN WEIGHT(gm)	AGRONOMIC SCORE	DRY PANICLE WEIGHT(gm)	DAYS TO FLOWERING	GRAIN WEIGHT (gm)	OVERALL DISEASE SCORE	OVERALL PEST SCORE	PANICLES HARVESTED	PLANT HEIGHT(cm)	PLANT STAND AFTER THINNING	PLANT VIGOR	YIELD (t/ha)	NUMBER OF STRIGA FORMING CAPSULES	MAXIMUM STRIGA COUNT	ASNPC
AKUOR-ACHOTxICSVIII_IN	3.267	4.333	81	97	65	5.667	5	8.67	142.3	15	3.333	0.43	34	104.7	3446
B35xAKUOR-ACHOT	2.567	3	847	81	407	6.667	6.667	21.33	145	25.33	3.333	2.72	20.7	36.3	1575
B35xE36-1	3.3	4.333	193	81	72	6.667	5	7.33	159.7	23	2.333	0.48	33	69.7	3064
B35xF6YQ212	2.433	3.667	331	79.67	142	6.667	6.333	13	133.7	22.33	3	0.95	10.3	34.7	1195
B35xICSVIII_IN	1.867	5	247	85	112	7	5.667	15	150.7	22.33	3	0.75	8	20.3	922
B35xLANDWHITE	2.5	4.333	290	89	188	5.333	5	7.33	175	20.67	3	1.26	18	33.3	1318
B35xLODOKA	2.6	3.667	556	88	305	5	6	18.67	203.7	28	3	2.03	11.7	19	824
E36-1xMACIA	3.533	3	726	89.34	374	5.667	4	18.33	184	24.67	3.333	2.49	22.3	89.7	3843
F6YQ212xB35	3.6	4.167	734	89	427	5.333	6	21.33	193.7	22.33	3.667	2.85	6.3	24.7	714
F6YQ212xLODOKA	3.1	5	239	90.67	128	7.333	6.667	13.33	235.3	24.33	2.667	0.85	22.3	54.3	2522
IBUSARxE36-1	2.664	5	527	81	315	7	6.667	13.94	247	24	4	2.1	32	78.7	2844
IBUSARxICSVIII_IN	2.664	2.333	527	133.67	315	5	5	13.94	260.3	20.33	3	2.1	26	66.3	6118
IBUSARxLANDWHITE	1.667	2.333	952	78.34	677	3.667	3.667	18.33	172.7	29.67	2.333	4.51	37.7	148	3414
ICSVIII_INxB35	3.3	3	1171	82.34	530	3.667	3	18.33	168.3	24	2.667	3.53	15	35.7	1328
ICSVIII_INxE36-1	3.767	3.5	329	77	377	5	5.667	17.67	166.7	23.33	3.333	2.51	26.3	60	2875
ICSVIII_INxLANDWHITE	1.167	3	1089	70.67	745	6.333	5	16	260.7	22.33	3	4.96	16.3	54	3101
ICSVIII_INxLODOKA	3.967	4	140	86	119	7.333	6	6.52	198	11.67	4	0.79	22	38.3	1244
ICSVIII_INxMACIA	2.067	4.333	572	80.67	404	5	3.333	12.67	232.3	20.67	2.333	2.69	24.7	74.7	2212
LANDWHITExB35	3.633	4.667	200	79.67	116	5.333	6.667	7.67	173	19.67	3	0.77	46	93.3	4251
LANDWHITExMACIA	3.067	2.667	190	70.67	143	7	6.333	7.33	177.7	17	2.333	0.96	20.7	89	3502
LODOKAxICSVIII_IN	1.6	2	920	78	532	5.333	2.333	15.67	148.3	26	2.333	3.55	20	54.3	2364
LODOKAxLANDWHITE	1.5	5.333	325	95.34	166	5.333	5	7.67	324	22.67	3.333	1.11	13.7	36.7	1652
LODOKAxOKABIR	2.333	2	334	77.67	226	4.667	2.333	7.67	184	17	2.667	1.5	49.7	157	6225
OKABIRxAKUOR-ACHOT	1.067	2.667	953	68	532	4.667	4.333	17.67	183.7	26.67	2.667	3.55	26	65.7	2536
OKABIRxB35	2.664	5	527	90.34	315	6	6.333	13.94	195.3	17.33	4	2.1	21.7	49.7	2427
OKABIRxICSVIII_IN	3.367	4.667	708	94.67	450	3.667	5	23	275.3	22.33	3.333	3	27.3	62	2046
MEAN	2.664	3.731	527	85.14	315	5.628	5.115	13.94	195.8	22.03	3.038	2.1	23.5	63.5	2599
CV	29.7	11.7	44.6	9.1	46.1	11.3	12.1	29	10.9	19.4	18	46.1	47.7	15.5	51.3
LSD	1.3024	0.7151	387.3	12.756	238.5	1.0405	1.0137	6.664	35.02	6.997	0.8952	1.59	18.41	54.22	2187.5
FPR	<0.01	<0.01	<0.01	<0.01	<0.01	<0.01	<0.01	<0.01	<0.01	<0.01	<0.01	<0.01	<0.01	<0.01	<0.01

## Sheet: CorrelationsSickplot
CORRELATION COEFFIENTS FOR TRAITS IN THE SICKPLOT SICKPLOT
	HGW (gm)	ASNPC	DTF	DPWT (gm)	NSFC	ODS	OPS	PH (cm)	NSmax
HGW (gm)	-
ASNPC	-0.1341NS	-
DTF	-0.0063NS	0.2081NS	-
DPWT (gm)	0.1645NS	-0.1377NS	-0.3008**	-
NSFC	-0.165NS	0.7686***	0.111NS	-0.1928NS	-
ODS	0.0112NS	-0.0481NS	-0.2031NS	-0.3249**	-0.0556NS	-
OPS	0.1672NS	-0.2014NS	-0.0485NS	-0.3337**	-0.1743NS	0.4888***	-
PH (cm)	-0.2201NS	0.1278NS	0.2679*	0.0402NS	0.0712NS	-0.3472**	-0.0764NS	-
NSmax	-0.287*	0.828***	0.0716NS	-0.2259NS	0.7998***	-0.109NS	-0.1893NS	0.168NS	-
YLD (t/ha)	0.2288NS	-0.1389NS	-0.3109**	0.9438***	-0.1883NS	-0.3102**	-0.2769*	0.0264NS	-0.2177NS
HGW - Hundred grain weight; ASNPC-Area Under Striga Number Progress Curve; DPWT - Dry panicle weight; DTF-Days To Flowering; NSFC - Number of Striga forming capsules; ODS - Overall disease score; OPS - Overall pest score; PH - Plant height; YLD - yield
* Significant at <0.05
**Significant at <0.01
***Significant at< 0.001

## Sheet: HeritabilitySickplot
		HERITABILITY ESTIMATES FOR TRAITS IN SICKPLOT (PROGENIES)
	RANGE	MEAN	MSG	MSE	σ2 G	σ2 P	PCV	GCV	H2 bs
100 GW	1.07 - 3.97	2.66	2.329	1.387	0.314	0.776333	33.124	21.0661	0.404465
DPW	81 - 1171	530	342926	844.7	114027	114309	63.7916	63.713	0.99
DTF	68 -133.67	85.22	463.62	61.74	133.96	154.54	14.5874	13.5814	0.866831
DTM	103 -157.33	123.7	223.81	12.4	70.47	74.6033	6.98248	6.78629	0.944596
YIELD	0.43 -4.96	2.1	187.82	65.48	40.78	62.6067	376.783	304.092	0.651368
ODS	3.67 - 7.33	5.65	3.608	0.4183	1.06323	1.20267	19.4099	18.2501	0.884063
OPS	2 -6.67	5.143	5.1505	0.366	1.59483	1.71683	25.477	24.5551	0.928939
PANICLES HARVESTED	6 TO 23	14.05	85.52	16.67	22.95	28.5067	38.0012	34.0969	0.805075
PLANT HEIGHT	133.7 - 324	195.3	6738	466	2090.67	2246	24.2662	23.4121	0.93084
NS Max	19 -148	61.8	3061	1128	644.333	1020.33	51.6871	41.074	0.631493
NSFC	6 TO 46	23.1	298.2	133.8	54.8	99.4	43.16	32.0463	0.551308
TOTAL ASNPC	714- 6225	2599	6203111	1779196	1.47464e+06	2.0677e+06	55.3271	46.7236	0.713177
The H2 bs scores were classification : 0–30% = low; 30–60% = moderate; and >60% = high.
100 GW-100 GRAIN WEIGHT(gm), DPW-Dry Panicle Weight, DTF-Days To Flowering, DTM-Ddays to Maturity, ODS-Overall Disease Score,OPS-Overall Pest Score,Nmax-Maximum Striga Count, NSFC-Number of Striga plants Forming Capsules, ASNPC-Area Under Striga Number Progress Curve
	HERITABILITY ESTIMATES FOR TRAITS IN SICKPLOT (PARENTS)
	RANGE		MSG	MSE	σ2 G	σ2 P	PCV	GCV	H2 bs
100 GW	0.33 - 3.5	2.092	4.2	0.3391	1.28697	1.4	56.5591	54.2278	0.919262
DPW	14 - 858	305	149443	17096	44115.7	49814.3	73.1775	68.8647	0.885602
DTF	64.67 - 105.33	83.67	218.8	42.12	58.8933	72.9333	10.2069	9.17198	0.807495
DTM	98.67 - 125.33	119.1	95.399	9.177	28.7407	31.7997	4.73478	4.50129	0.903804
YIELD	0.05 -3.54	0.921	2.8607	0.3611	0.8332	0.953567	106.027	99.1094	0.873772
ODS	3.67 - 8	6.041	3.5626	0.7051	0.9525	1.18753	18.0391	16.1556	0.802083
OPS	3.33 - 7.33	5.459	2.7032	0.7359	0.655767	0.901067	17.3886	14.8341	0.727767
PANICLES HARVESTED	2.50 - 58.33	19.87	610.76	25.58	195.06	203.587	71.8087	70.2888	0.958118
PLANT HEIGHT	87.70 -266.7	170.2	5559.7	304	1751.9	1853.23	25.2933	24.5921	0.945321
NS Max	7 - 168	50.8	5623	1532	1363.67	1874.33	85.2236	72.6926	0.727548
NSFC	1 TO 71	20.9	848.3	140.9	235.8	282.767	80.4577	73.4726	0.833903
TOTAL ASNPC	0-5698	2012	7863173	1966274	1965633	2.62106e+06	80.4656	69.6824	0.749939
The H2 bs scores were classification : 0–30% = low; 30–60% = moderate; and >60% = high.
100 GW-100 GRAIN WEIGHT(gm), DPW-Dry Panicle Weight, DTF-Days To Flowering, DTM-Ddays to Maturity, ODS-Overall Disease Score,OPS-Overall Pest Score,Nmax-Maximum Striga Count, NSFC-Number of Striga plants Forming Capsules, ASNPC-Area Under Striga Number Progress Curve

[truncated: 2 more sheets: RSI Potted trial, RSI Sickplot]
